# Supplementary material
Source: Elsevier journal article supplement (https://www.sciencedirect.com/science/article/pii/S0021755717306848)
Supplement: mmc1 [file S0021755717306848:mmc1.docx]

**Annex 1 - Summary of the bias risk of the studies with their respective result in each item of the evaluation.**


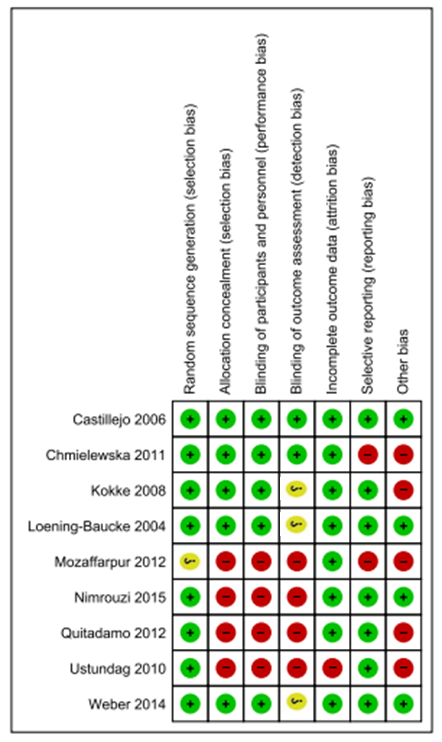


- = low risk of bias;
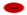
 = high risk of bias;
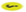
 = undetermined risk of bias.
