# Supplementary material
Source: Elsevier journal article supplement (https://www.sciencedirect.com/science/article/pii/S0021755717306848)
Supplement: mmc2 [file S0021755717306848:mmc2.docx]

**Annex 2 - Scores of the selected articles on the Jadad scale.**

| **Article** | **Score on the Jadad scale** |
| --- | --- |
| **Castillejo 2006** | 5 |
| **Kokke 2008** | Four |
| **Loening-Baucke 200Four** | Four |
| **Chmielewska 2011** | 5 |
| **Mozaffarpur 2012** | 1 |
| **Nimrouzi 2015** | 2 |
| **Quitadamo 2012** | 2 |
| **Ustundag 2010** | 2 |
| **Weber 201Four** | Four |
